# Supplementary material for: Sperm selection with density gradient centrifugation and swim up: effect on DNA fragmentation in viable spermatozoa
Source: PubMed Central journal article supplement (PMC6522556; doi:10.1038/s41598-019-43981-2), 2019-05-16
Supplement: 41598_2019_43981_MOESM1_ESM.pdf [file 41598_2019_43981_MOESM1_ESM.pdf]

## Sperm selection with density gradient centrifugation and swim up: effect on DNA fragmentation in viable spermatozoa

M Muratori, N Tarozzi, F Carpentiero, S Danti, F M Perrone, M Cambi, A Casini, C Azzari, L Boni M Maggi, A Borini, E Baldi

**Supplemental Table S1.** Sperm parameters in subjects increasing and decreasing total sDF after selection with DGC and swim up (in the SW-G and SW-P group). Data are mean±SD.

| Variable                          | DGC                |                    |       | SW-G              |                    |       | SW-P              |                    |       |
|-----------------------------------|--------------------|--------------------|-------|-------------------|--------------------|-------|-------------------|--------------------|-------|
|                                   | Sample             | Sample             | p #   | Sample            | Sample             | p #   | Sample            | Sample             | p #   |
|                                   | Increasing<br>n=10 | Decreasing<br>n=10 |       | Increasing<br>n=3 | Decreasing<br>n=17 |       | Increasing<br>n=5 | Decreasing<br>n=15 |       |
| Sperm Concentration (millions/ml) | 75.5±45.2          | 55.60±32.0         | 0.271 | 74.9±56.6         | 148.3±110.2        | 0.281 | 33.07±39.83       | 99.50±52.22        | 0.012 |
| Sperm Number (millions/ejaculate) | 204.6±178.3        | 226.40±152.8       | 0.773 | 237.4±119.2       | 491.3±342.8        | 0.229 | 110.27±110.43     | 372.44±258.63      | 0.029 |
| Progressive Motility (%)          |                    |                    |       |                   |                    |       |                   |                    |       |
| Before selection                  | 47.7±14.0          | 43.6±11.8          | 0.487 | 63.0±8.9          | 53.4±9.0           | 0.102 | 52.17±4.36        | 52.64±12.74        | 0.931 |
| After selection                   | 76.1±9.3           | 81.5±5.9           | 0.137 | 76.5±4.9          | 85.9±14.9          | 0.405 | 75.33±13.43       | 83.43±6.06         | 0.074 |
| P-value§                          | 0.001              | 0.001              |       | 0.197             | 0.001              |       | 0.011             | 0.001              |       |
| Motility improvement              | 28.7±13.6          | 37.7±14.9          | 0.177 | 15.5±16.9         | 33.2±11.1          | 0.057 | 19.4±12.5         | 31.5±12.8          | 0.081 |

# Sample increasing vs sample decreasing, t-Test, independent data. § before vs after selection, t-Test, paired data

**Supplemental Table II.** Sperm parameters in samples increasing and decreasing viable sDF after selection with DGC and swim up (in the SW-G and SW-P group). Data are mean±SD.

| Variable                          | DGC                          |                             |       | SW-G                        |                              |       | SW-P                        |                              |       |
|-----------------------------------|------------------------------|-----------------------------|-------|-----------------------------|------------------------------|-------|-----------------------------|------------------------------|-------|
|                                   | Sample<br>Increasing<br>n=12 | Sample<br>Decreasing<br>n=8 | p #   | Sample<br>Increasing<br>n=8 | Sample<br>Decreasing<br>n=12 | p #   | Sample<br>Increasing<br>n=8 | Sample<br>Decreasing<br>n=12 | p #   |
| Sperm Concentration (millions/ml) | 58.7±35.1                    | 70.08±42.9                  | 0.544 | 102.1±48.9                  | 160.8±128.3                  | 0.235 | 53.8±63.6                   | 96.7±47.4                    | 0.100 |
| Sperm Number (millions/ejaculate) | 218.6±172.3                  | 213.42±162.6                | 0.946 | 286.1±142.3                 | 564.6±376.5                  | 0.063 | 197.5±235.9                 | 358.0±253.3                  | 0.171 |
| Progressive Motility (%)          |                              |                             |       |                             |                              |       |                             |                              |       |
| Before selection                  | 42.0±12.5                    | 48.1±12.8                   | 0.309 | 58.6±7.2                    | 52.3±10.1                    | 0.141 | 48.0±10.8                   | 55.5±10.0                    | 0.130 |
| After selection                   | 80.0±5.4                     | 78.0±9.5                    | 0.599 | 85.0±12.3                   | 84.4±16.4                    | 0.942 | 77.0±11.7                   | 83.7±6.6                     | 0.120 |
| P-value§                          | 0.001                        | 0.001                       |       | 0.004                       | 0.001                        |       | 0.002                       | 0.001                        |       |
| Motility Improvement              | 30.8±13.6                    | 36.7±16.5                   | 0.392 | 27.4±15.8                   | 33.6±10.1                    | 0.353 | 29.0±17.6                   | 28.1±10.8                    | 0.897 |

# Sample increasing vs samples decreasing, t-Test, independent data. § before vs after selection, t-Test, paired data

**Supplemental Table III.** Multivariate analysis: total and viable sDF values after selection, before and after adjustment for basal (total or viable) sDF values (model 1) and for basal (total or viable) sDF and sperm progressive motility and number (model 2).

|                             | <b>DGC</b><br>(mean±SE) | <b>SW-G</b><br>(mean±SE) | <b>SW-P</b><br>(mean±SE) |
|-----------------------------|-------------------------|--------------------------|--------------------------|
| Total sDF before selection  | 41.48± 4.37             | 41.48±4.37               | 41.48±4.37               |
| Total sDF after selection   |                         |                          |                          |
| Unadjusted                  | 47.44±5.93              | 26.99±5.93               | 31.42±5.93               |
| Model 1                     | 47.45±5.75              | 26.99±5.75               | 31.43±5.75               |
| Model 2                     | 44.29±5.92              | 30.97±5.91               | 30.60±5.60               |
| Viable sDF before selection | 26.07±4.45              | 24.85±4.45               | 20.45±4.45               |
| Viable sDF after selection  |                         |                          |                          |
| Unadjusted                  | 39.78±5.91              | 23.60±5.91               | 21.70±5.91               |
| Model 1                     | 39.17± 5.85             | 23.31±5.84               | 22.60±5.87               |
| Model 2                     | 36.47±6.03              | 27.02±6.01               | 21.59±5.72               |

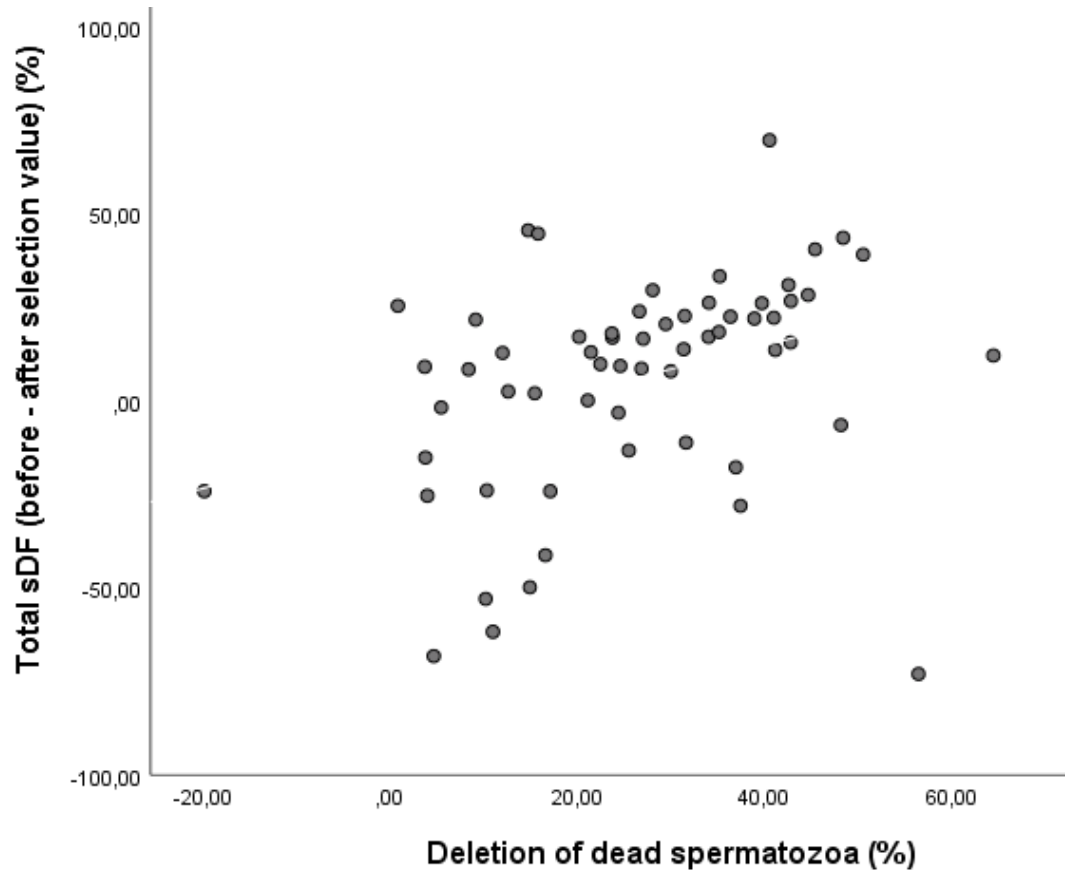

**Supplemental Figure 1.** Effect of elimination of dead spermatozoa during selection on the variation of total sDF. Difference of total sDF before and after selection plotted against the amount of dead spermatozoa eliminated during selection with DGC and swim up (n=60).
